# Supplementary material
Source: MDPI journal article supplement (https://www.mdpi.com/1424-8247/17/1/24)
Supplement: s1 [file s1]

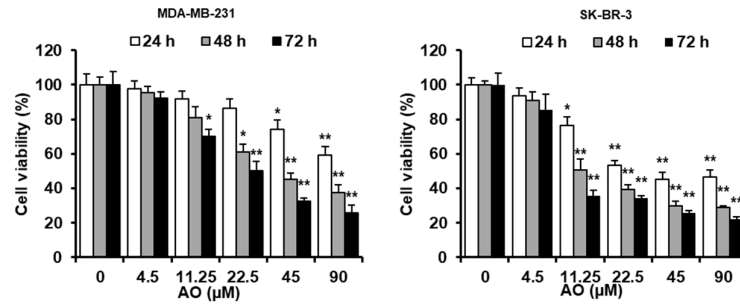

**Figure S1.** The comparative evaluation of the AO effect on cell viability over 24, 48, and 72 hours using the SRB assay in MDA-MB-231 and SK-BR-3 cells. AO exhibited a concentration- and time-dependent decrease in cell viability in breast cancer cells. Results are presented as means  $\pm$  SDs (n=8). Statistical significance is indicated by \* representing p-values below 0.05, while \*\* represents those below 0.01. The Statistical differences were assessed using one-way analysis of variance (ANOVA) and subsequently verified using Fisher's least significant difference (LSD) test.
